# Supplementary material for: Metabolomics and Transcriptomics Provide Insights into Lipid Biosynthesis in the Embryos of Walnut (Juglans regia L.)
Source: Plants (Basel). 2023 Jan 24;12(3):538. doi: 10.3390/plants12030538 (PMC9921657; doi:10.3390/plants12030538)
Supplement: Supplementary file 1 [file plants-12-00538-s001.zip › Table S1.xlsx]

## Sheet: Sheet1
Table S1. Summary of sequencing data of walnut embryos and information of clean reads.
Sample	Time (DAP)	Raw Data read	Valid Data Read	Clean data(G)	Valid Ratio(reads)	Q20%	Q30%	GC content%
L1_1	60	45813434	42120292	6.32G	91.94	99.99	98.04	47
L1_2	60	46560272	41906456	6.29G	90	99.98	97.94	47
L1_3	60	48981496	44361060	6.65G	90.57	99.99	98.01	47
L2_1	90	54626784	50167420	7.53G	91.84	99.99	98.31	50
L2_2	90	43407230	39921788	5.99G	91.97	99.99	98.28	50
L2_3	90	49377248	46454938	6.97G	94.08	99.99	98.32	50
L3_1	120	53553718	49897992	7.48G	93.17	99.99	98.28	50
L3_2	120	51464218	47891530	7.18G	93.06	99.99	98.24	50
L3_3	120	50829238	47431580	7.11G	93.32	99.99	98.32	50
