# Supplementary material for: Metabolomics and Transcriptomics Provide Insights into Lipid Biosynthesis in the Embryos of Walnut (Juglans regia L.)
Source: Plants (Basel). 2023 Jan 24;12(3):538. doi: 10.3390/plants12030538 (PMC9921657; doi:10.3390/plants12030538)
Supplement: Supplementary file 1 [file plants-12-00538-s001.zip › Table S2.xlsx]

## Sheet: Sheet1
Table S2. The mapping result of each sample.
Sample	Time (DAP)	Total_Mapped(%)	Unique_Mapped(%)	Multiple_Mapped(%)
L1_1	60	40727723(96.69%)	31603955(75.03%)	9123768(21.66%)
L1_2	60	40534642(96.73%)	31377817(74.88%)	9156825(21.85%)
L1_3	60	42929673(96.77%)	33275822(75.01%)	9653851(21.76%)
L2_1	90	48347362(96.37%)	33521782(66.82%)	14825580(29.55%)
L2_2	90	38490289(96.41%)	26946646(67.50%)	11543643(28.92%)
L2_3	90	44748568(96.33%)	31579974(67.98%)	13168594(28.35%)
L3_1	120	48336625(96.87%)	35199899(70.54%)	13136726(26.33%)
L3_2	120	45388533(94.77%)	32362181(67.57%)	13026352(27.20%)
L3_3	120	45682019(96.31%)	33218486(70.03%)	12463533(26.28%)
