# Supplementary material for: Metabolomics and Transcriptomics Provide Insights into Lipid Biosynthesis in the Embryos of Walnut (Juglans regia L.)
Source: Plants (Basel). 2023 Jan 24;12(3):538. doi: 10.3390/plants12030538 (PMC9921657; doi:10.3390/plants12030538)
Supplement: Supplementary file 1 [file plants-12-00538-s001.zip › Table S3.xlsx]

## Sheet: Sheet1
Table S3. Differentially expressed transcription factor families
Transcription factor family	Number
bHLH	83
ERF	66
G2-like	30
bZIP	28
GATA	22
MYB	19
WRKY	17
Trihelix	17
E2F/DP	15
TCP	14
AP2	13
NF-YA	10
C2H2	8
HSF	7
B3	5
NAC	5
MYB_related	5
NF-YB	5
M-type_MADS	4
NF-YC	4
RAV	1
VOZ	1
CPP	1
GeBP	1
GRAS	1
MIKC_MADS	1
NF-X1	1
