# Supplementary material for: Metabolomics and Transcriptomics Provide Insights into Lipid Biosynthesis in the Embryos of Walnut (Juglans regia L.)
Source: Plants (Basel). 2023 Jan 24;12(3):538. doi: 10.3390/plants12030538 (PMC9921657; doi:10.3390/plants12030538)
Supplement: Supplementary file 1 [file plants-12-00538-s001.zip › Table S4.xlsx]

## Sheet: Sheet1
Table S4. Identified related genes and metabolites involved in Lipid-Related.
Enzymes	KEGG annotation	Gene ID	FPKM
			60DAP			90DAP			120DAP
			L1_1	L1_2	L1_3	L2_1	L2_2	L2_3	L3_1	L3_2	L3_3
ACC/ BCCP	acetyl-CoA carboxylase biotin carboxyl carrier protein	108986433	66.2273	68.0356	61.1217	31.5784	33.7397	27.6802	31.0301	32.9334	28.0228
		108987217	37.0586	39.4221	35.7489	12.9502	12.2983	11.4719	16.9098	15.7236	16.9881
		108988222	174.244	181.659	168.682	90.0791	96.9193	90.7127	91.1222	89.6833	87.7442
ACC/CTα	acetyl-CoA carboxyl transferase subunit alpha	109004195	68.1082	65.7403	67.1245	31.5851	33.5671	33.9209	20.2955	22.5532	18.6777
		108981788	42.3147	37.5574	48.7323	26.0627	27.7755	24.1772	15.6719	17.8107	15.5206
		109000808	136.849	129.742	137.754	74.0152	71.8811	74.4474	48.0536	52.1659	41.6362
		109009035	4.33079	3.21878	3.50625	2.23386	2.27339	2.30351	2.82625	2.76456	1.91887
		109018146	5.7718	6.0305	6.38351	2.71515	2.60163	3.12993	2.66611	3.21267	2.29974
ACC/BC	acetyl-CoA carboxylase biotin carboxylase subunit	109007141	148.634	144.742	153.176	46.7448	46.6711	45.3559	42.6195	41.4488	41.36
MCAT	malonyl CoA-acyl carrier protein transacylase	108989851	48.0673	48.4928	48.1689	10.7643	11.6273	10.8797	8.67946	10.3668	9.66587
		108996994	66.1503	65.1062	62.3183	22.4993	23.3515	22.3342	21.6211	21.0972	20.9263
KASIII	3-oxoacyl-ACP synthase III	109008688	15.5097	14.8401	15.8485	5.56698	4.42677	4.57979	5.69072	5.6045	5.8076
		109011421	45.6357	45.1211	49.7857	11.254	12.5138	10.0147	9.71898	9.45594	10.5388
KAR	3-oxoacyl-ACP reductase	108986581	24.9384	24.0612	23.8511	7.60768	7.95712	7.47198	11.5687	10.8589	12.9741
		109008671	24.8751	27.6304	27.5889	46.4432	52.2531	48.1043	28.0526	28.1553	38.9207
		109014553	119.071	112.221	116.073	37.0351	38.6265	37.8208	20.2985	21.579	23.2019
HAD	3-hydroxyacyl-ACP dehydratase	109013246	111.347	117.463	114.657	28.0255	27.7177	26.9519	29.4341	29.682	28.4571
ENR	enoyl-ACP reductase	108994493	153.324	150.878	146.816	35.4083	35.2795	34.3551	27.7935	28.3842	34.9584
		109001699	247.312	250.183	243.324	82.9935	83.1798	77.7978	45.6806	43.3465	49.1858
		108986080	6.05	6.18328	4.33455	1.91761	2.24987	2.16261	0.942688	1.44985	0.734215
		108986075	9.3878	8.25074	10.6631	2.98645	3.6018	2.82661	1.18452	2.30949	1.45981
KASII	3-oxoacyl-ACP synthase II	108980435	23.7657	21.6272	24.1496	8.96377	7.48604	7.21065	8.15931	7.24307	9.28479
		109001952	3.09224	2.80879	3.09423	7.8774	7.87484	7.5345	4.03063	4.65383	3.21926
		108990643	90.1985	85.91	86.3597	49.893	52.3092	49.1712	35.7348	35.9993	38.4174
		109011759	39.5551	37.3818	35.9208	15.1658	16.8741	16.76	13.8288	12.1719	15.7037
		109010950	11.468	11.7487	11.8623	2.06927	2.27603	2.01659	2.32588	2.06571	2.22466
KASI	3-oxoacyl-ACP synthase I	108985417	2.28067	2.16766	1.79377	0.310882	0.579875	0.322669	0.046107	0.077555	0.215358
		108990265	88.5247	86.9699	83.6362	29.5916	28.8698	27.0195	23.8912	22.3661	24.5976
		109013084	198.747	175.266	180.955	43.0537	39.4192	38.4163	32.1623	31.6122	29.9956
FATA	fatty acyl-ACP thioesterase A	109013822	6.18207	5.42226	5.81545	1.07174	1.73653	1.36833	2.35085	3.01677	3.16761
		108998294	100.795	105.589	108.048	41.8804	41.7974	43.3095	26.6229	28.0349	34.0701
FATB	fatty acyl-ACP thioesterase B	108992677	16.7907	15.6158	16.8676	1.85028	2.52949	2.2206	2.36774	1.66836	1.74352
		109004120	24.4298	24.6028	26.3895	8.92342	10.5271	8.7363	6.7327	6.93935	8.04433
		109007834	2.28142	1.72507	1.82703	1.4582	1.11411	1.73988	1.20289	1.82535	1.38614
SAD	stearoyl-ACP-desaturase	108984606	317.255	341.052	339.957	295.222	318.048	294.439	251.523	225.575	266.141
		109005061	494.071	495.433	492.726	185.833	188.741	182.807	261.773	246.039	285.184
		109012153	367.803	393.341	381.36	570.256	633.404	536.495	311.917	293.164	324.842
		108988959	1.72337	1.9137	1.71977	0.0001	0.0001	0.0001	0.0001	0.0001	0.0001
LACS	long-chain acyl-CoA synthetase	108982045	12.9337	11.4415	13.2688	1.89413	2.1227	1.50306	1.14829	1.5731	1.56919
		108982330	9.46044	8.43853	8.15891	1.13382	1.29845	1.27828	3.1569	2.25047	2.58757
		108984899	115.423	105.948	104.73	21.0486	21.147	21.7468	9.82208	10.8233	7.69529
		108988323	24.9096	23.0332	23.4073	8.80321	9.39664	9.4158	3.1642	3.66543	3.10656
		108993714	10.1552	9.75775	10.4612	0.955067	0.863902	0.885381	1.49809	1.51321	1.59847
		108993803	46.4513	41.7809	42.2146	5.66186	7.30926	6.10152	5.24451	5.1742	4.51722
		109008426	26.0335	27.1874	26.0425	9.65787	9.24404	9.87512	4.82941	5.05275	3.62463
		109009739	13.123	13.5876	15.2347	2.05152	1.9104	2.34026	2.15041	1.61019	1.55024
		109010453	44.6387	41.5085	41.357	7.21246	6.52953	6.99138	16.9249	18.1791	12.7578
		109011864	58.023	56.8141	54.7293	27.6171	27.9208	26.4606	35.1245	37.4858	35.4104
		108987140	14.2618	15.098	14.0547	7.26031	7.3418	7.75734	10.4696	11.1185	10.4436
		109005861	25.9341	26.591	25.4539	14.8246	14.2427	14.6532	18.7049	19.3334	12.5123
		109016099	6.23862	4.41562	4.56981	2.26487	2.56186	1.73166	0.9742	1.42629	0.46454
FAD2	fatty acid desaturase 2	109001694	1313.6	1341.09	1307.27	1882.18	1918.28	1833.09	1501.28	1449.97	1478.75
		109011954	210.144	214.714	197.565	24.8715	25.3432	24.7614	22.4944	22.6849	19.4029
DGAT1	diacylglycerol acyltransferase 1	109009388	5.04146	4.22696	3.8304	1.63723	1.37868	1.65822	3.39235	3.28296	2.65573
PDAT	phospholipid:diacylglycerol acyltransferase	108983791	21.4808	21.6116	20.9727	4.71373	4.76318	3.79188	7.22042	5.3411	7.30591
		108985608	16.7658	15.7468	14.737	5.28582	4.93372	4.98861	2.61112	2.62167	2.0421
		108995988	19.583	18.8335	18.1188	3.2138	3.73808	3.54264	3.12638	3.1237	3.03881
		109000668	20.2524	20.1004	21.8348	45.6492	48.8924	47.7156	26.7534	24.3381	26.0297
		109005305	13.2115	13.0196	12.3204	0.365673	0.735434	0.622388	1.06843	0.84771	0.767652
		109007872	4.81527	5.08076	4.81541	2.13166	1.38421	2.70957	4.26956	3.53058	4.58792
		109008819	21.1513	19.2698	19.8328	9.28887	9.15768	9.98001	14.2812	15.0675	12.4581
GPAT	glycerol-3-phosphate acyltransferase	108981658	7.32357	7.3539	6.93348	1.53004	1.62924	1.04661	3.22414	3.21469	2.7208
		108994904	3.71924	3.52945	3.505	0.473944	0.374824	0.205694	0.175633	0.329346	0.186367
		108998102	9.96005	9.1492	9.98554	2.37867	1.86176	2.35253	2.60478	2.80136	2.60838
		109006642	25.4843	26.6608	27.1132	16.3194	19.0924	17.4448	16.351	16.3008	19.393
PAP	phosphatidate phosphatase	108987624	4.71503	4.37939	4.8088	3.31862	3.1208	3.64316	2.93706	4.36591	2.55476
		108988443	8.38433	7.66549	8.90609	5.77976	6.33177	6.88255	6.83433	8.87983	5.60698
		108995777	1.36864	1.38334	1.31334	0.634224	0.736525	1.06848	1.11112	1.14141	0.4563
LPAAT	lysophosphatidic acid acyltransferase	108984380	51.0769	48.3863	50.0306	25.9884	26.8787	26.2645	34.6438	31.7948	40.0395
		108993239	9.73551	9.14997	9.49759	5.32165	5.27026	4.98144	4.86285	4.9513	4.87241
		109002485	2.18094	2.07815	2.34289	0.374529	0.396886	0.475229	0.674564	0.436772	0.915763
		109020163	8.80494	9.42244	9.45624	4.65361	4.78471	4.56909	4.72689	5.5484	5.02295
LPCAT	lysophospholipid acyltransferase	108991699	2.19947	2.19617	2.76877	0.664745	0.715441	0.509892	0.764767	0.794862	0.407526
		108995554	14.3638	14.568	15.2376	5.0834	4.34841	4.66161	4.55212	4.1869	4.356
		109011026	9.21234	9.17631	7.57226	4.9599	4.65105	4.66203	5.86909	5.85897	4.27213
		109022172	16.3326	14.5001	15.2658	5.35138	6.53307	5.40953	6.2951	6.72742	5.1112
MS2Metabolite	MS2kegg	ID	Peak area
			60DAP						90DAP						120DAP
			L1_1	L1_2	L1_3	L1_4	L1_5	L1_6	L2_1	L2_2	L2_3	L2_4	L2_5	L2_6	L3_1	L3_2	L3_3	L3_4	L3_5	L3_6
LysoPC 18:1	C04230	neg-M566T408	13972.3	26306.2	39856.4	11720.3	3214.11	5664.82	132170	137093	142664	537667	145322	145113	53941.7	81223.7	146830	46867.6	78185.6	113684
LysoPC 18:2	C04230	neg-M564T379	104058	269280	461327	110990	46573.4	101262	152278	184299	38688.3	418719	416398	93085.1	502400	1.12483e+06	738170	1.97232e+06	2.59822e+06	1.84956e+06
LysoPC 18:3	C04230	pos-M518T354	43141	71205.6	133719	39936.4	32464.8	85680	12196.6	26485.4	17799.8	54961.4	128219	52132.7	180595	926636	280406	116569	410123	1.34754e+06
Triacylglycerol	C00422	pos-M1040T378	522.337	631.319	1982.94	1044.66	400.502	548.105	860.908	1337.93	953.022	5945.63	6682.9	3233.71	9508.24	50237.7	12136.1	5583.76	38076.1	442720
