# Supplementary material for: Metabolomics and Transcriptomics Provide Insights into Lipid Biosynthesis in the Embryos of Walnut (Juglans regia L.)
Source: Plants (Basel). 2023 Jan 24;12(3):538. doi: 10.3390/plants12030538 (PMC9921657; doi:10.3390/plants12030538)
Supplement: Supplementary file 1 [file plants-12-00538-s001.zip › Table S5.xlsx]

## Sheet: Sheet1
Table S5. Identified related genes and metabolites involved in glycolysis/gluconeogenesis
Enzymes	KEGG annotation	Gene ID	FPKM
			60DAP			90DAP			120DAP
			L1_1	L1_2	L1_3	L2_1	L2_2	L2_3	L3_1	L3_2	L3_3
HK	hexokinase	109000874	9.71477	8.63883	8.03083	4.35866	3.92034	4.63115	1.28892	1.42786	1.14419
		109021721	73.8378	71.7718	73.6666	25.9356	24.1636	24.6566	25.814	28.7061	22.0382
PGM	phosphoglucomutase	108998598	37.724	36.4235	36.9944	17.3913	16.0226	16.2722	14.9001	16.4734	13.7551
		109003961	177.852	176.879	170.618	74.521	76.4406	73.195	118.842	113.342	117.613
		108995508	124.61	119.349	117.547	64.9953	58.091	58.4455	14.0034	14.8585	15.308
		109014743	2.08068	14.9837	2.33006	1.16584	1.18242	6.3738	0.291502	0.315424	0.320906
GALM	aldose 1-epimerase	108980349	121.665	119.85	127.861	31.3965	34.9843	31.5861	40.2921	37.2109	43.7986
GPI	glucose-6-phosphate isomerase	108985058	84.3493	78.4914	81.0133	22.9258	22.3423	24.2603	21.0869	21.1905	19.9675
		108995559	60.3225	58.1057	57.9294	21.5895	20.4666	19.6898	24.7171	24.0493	24.6416
		109005545	3.46468	3.56516	3.42318	0.0001	0.017502	0.0001	0.0001	0.0001	0.0001
FBP	fructose-1,6-bisphosphatase	109013864	17.914	17.8227	17.7706	5.34197	4.3211	5.20705	9.10656	8.36968	9.0569
PFKA	6-phosphofructokinase 1	108991233	28.8295	27.6955	29.957	9.45397	9.07165	9.58177	2.85921	3.20104	2.7489
		109003738	82.833	82.4083	82.1375	37.2996	41.3297	39.4674	21.9608	22.8289	21.3419
		108998278	20.9051	21.7249	21.543	9.05889	8.20125	7.90776	7.08634	7.27224	7.49197
		109005911	11.8011	12.2104	14.1157	3.42632	4.78101	4.3579	1.15433	0.989257	1.0412
		109007871	19.0857	18.3857	18.508	11.7579	12.1326	12.4106	3.76534	3.35747	3.91254
ALDO	fructose-bisphosphate aldolase	108985009	517.934	530.54	504.21	224.936	236.589	209.074	185.285	170.991	201.259
		108991375	11.5759	11.9202	10.5663	0.181351	0.376086	0.125763	0.773299	0.79743	1.01084
		109000122	88.5028	93.9926	101.366	39.0679	40.8285	36.6345	37.2065	35.1644	40.5599
		109005150	632.808	658.062	629.925	182.39	182.067	175.928	215.112	209.988	220.294
		109006536	48.436	49.1521	45.2258	12.9486	11.4744	12.0901	12.9879	11.7516	12.0515
		109007785	374.45	357.312	374.927	90.9167	84.0933	87.1387	94.8419	90.2769	105.057
		109008277	7.3094	8.30562	8.2066	0.246393	0.231239	0.314111	0.0001	0.034242	0.129105
		109012505	2.3668	1.77216	2.03658	0.678831	0.444263	0.716691	0.456488	0.270132	0.473582
TPI	triosephosphate isomerase	108986375	282.108	290.897	299.238	140.139	141.514	142.426	144.898	133.743	176.461
		108993001	227.123	234.909	240.461	41.3202	43.5331	41.9386	56.7819	51.9751	65.6035
PGK	phosphoglycerate kinase	108982549	3.2225	3.20367	3.23773	1.57133	1.40702	1.72323	1.39136	1.54361	0.928323
		109003587	71.6239	76.7634	75.381	14.3307	15.8795	14.3803	14.6546	13.9694	14.6568
		109011250	38.9409	38.2551	38.6285	13.982	14.1771	13.7591	9.86814	10.4815	8.03865
PGAM	2,3-bisphosphoglycerate-dependent phosphoglycerate mutase	108997197	17.4579	16.8805	16.8928	8.50316	8.28243	7.7845	3.02151	3.09157	3.52928
		109016665	5.92179	6.67748	6.01856	3.30291	2.62965	2.96929	1.09168	1.27626	1.12207
ENO	enolase	108979161	464.88	511.549	503.102	165.626	157.077	150.984	123.9	121.75	156.854
		108979951	51.3684	51.8611	47.2605	21.2971	21.0374	23.3051	10.2493	10.3898	11.2346
		108999457	393.545	372.997	419.105	129.929	138.967	132.219	121.068	122.35	160.378
		109000125	61.0493	63.7878	77.985	21.0554	20.6241	20.1032	18.0477	17.99	20.7863
		109005160	309.568	303.504	330.375	116.208	111.023	109.993	116.51	108.832	125.676
		109007404	37.1925	34.5036	38.0267	13.031	13.2287	12.7832	10.9005	11.3657	11.1431
PK	pyruvate kinase	108979677	9.46713	9.21229	10.1407	2.12442	2.79704	2.44887	2.57575	2.65612	2.51764
		108989469	74.4862	74.4801	73.4043	25.1704	24.2157	24.0671	15.4958	17.2682	13.9833
		108992385	8.90042	9.27099	9.30728	4.82036	4.01914	3.87159	2.05181	1.77317	1.61551
		109001916	15.0925	15.1536	16.7452	3.80116	4.43103	4.68097	4.00154	3.79091	3.20548
		109001918	11.4749	11.0249	11.3004	3.44739	3.43662	3.17344	3.54293	3.6875	2.95474
		109002762	44.4588	45.1369	46.3944	12.8543	12.5878	12.3534	12.7382	12.4515	14.0722
		109002958	61.1528	62.8437	63.8004	15.0136	16.0344	14.5967	21.6215	18.514	21.4858
		109005102	168.186	168.539	155.297	67.3807	67.162	65.0678	54.2875	58.8082	46.4773
		109007410	35.7529	33.1342	35.9048	12.014	12.3166	12.6174	13.6698	13.2334	12.6332
		109009364	67.4264	65.3506	74.7144	27.0333	26.9752	29.2803	17.0029	15.6497	20.6977
		109010859	224.698	210.909	229.737	70.0208	68.3972	69.2738	70.8349	75.4378	63.9444
		109020107	433.925	440.645	451.987	195.238	193.686	178.058	106.779	103.57	104.374
MINPP1	multiple inositol polyphosphate phosphatase1	108983886	34.778	36.3324	39.4085	10.1559	11.1548	9.83458	9.66754	9.65631	10.5709
PDC	pyruvate decarboxylase	108998404	27.2823	28.4032	27.222	9.11931	10.1082	8.58139	8.83498	8.8328	8.03918
PDH-E1α	pyruvate dehydrogenase E1 component alpha subunit	108989818	59.9834	54.3236	52.9224	11.5097	10.9589	9.91144	15.2664	15.074	15.5762
		108992640	312.87	309.606	308.451	144.142	150.053	147.653	160.105	153.252	187.773
		109008675	10.0353	7.99733	9.562	2.45793	2.84493	2.52295	3.24658	3.83298	3.33234
PDH-E1β	pyruvate dehydrogenase E1 component beta subunit	108983269	25.0831	24.8168	26.4564	7.01391	8.23867	8.77423	5.57447	5.39519	22.6453
		108990189	42.2296	44.282	39.6014	14.5927	14.8613	13.9342	9.55765	9.53024	10.7087
ADH	alcohol dehydrogenase	108982357	105.069	102.66	103.924	47.7661	48.1981	46.2758	56.1835	53.6988	68.8473
		108995858	2.67505	1.85333	3.05739	0.166631	0.0690747	0.172308	0.13346	0.198236	0.32792
		109005402	45.3755	42.5143	43.9709	24.546	20.7446	19.9433	22.3602	17.9019	23.2381
		109005404	5.74899	4.76738	5.52147	3.72874	3.94725	3.05333	7.67733	7.35999	9.913
ALDH	aldehyde dehydrogenase	108983652	31.5859	31.5974	33.559	7.05169	7.17523	6.8852	11.4705	10.6012	12.8781
		108985444	1.35584	0.885591	1.24512	0.0001	0.0001	0.0001	0.0001	0.0001	0.0001
		108994687	55.6175	55.8259	56.3116	10.881	9.63933	11.4511	8.2371	8.19558	8.38715
		108998675	1.81994	1.98681	1.50072	0.022587	0.0001	0.0001	0.0001	0.0001	0.0001
		108996365	5.7985	5.53047	6.57475	7.74324	7.28197	7.82209	30.6284	30.0987	38.1964
		108983383	0.977609	0.442014	0.170041	0.0628835	0.200022	0.0325018	0.0822657	0.023296	0.0664302
ACS	acetyl-CoA synthetase	108996314	40.6276	38.8256	36.4947	12.6113	11.5579	11.9649	7.99478	7.258	6.36216
DLAT	pyruvate dehydrogenase E2 component	108986750	73.1777	79.2902	74.9836	19.0451	18.4336	19.2974	17.6464	16.4166	17.3099
		108986754	82.0384	82.3731	76.5351	19.6729	20.3512	18.8619	14.0198	14.6666	12.0541
		109011725	26.5503	25.2514	25.0426	8.07595	7.53734	8.21877	13.6763	15.6923	12.2851
		109015577	7.24252	6.74021	6.82276	1.96996	2.20401	2.21152	2.31595	2.65697	2.16777
MS2Metabolite	MS2kegg	ID	Peak area
			60DAP						90DAP						120DAP
			L1_1	L1_2	L1_3	L1_4	L1_5	L1_6	L2_1	L2_2	L2_3	L2_4	L2_5	L2_6	L3_1	L3_2	L3_3	L3_4	L3_5	L3_6
Acetaldehyde	C00084	neg-M89T58	97590.7	106674	104304	77368.2	124526	85132	40590.1	16809.5	15371.9	17953.2	19198.9	19921.5	16570.3	9684.98	8756.44	12571.7	10816.7	9019.4
Pyruvic acid	C00022	neg-M87T72	55453.5	54641.9	32475	108968	47797.9	32898.7	20938.8	20514.4	20160.5	15835.3	15908.8	26623.1	5868.1	1396.6	5414.01	3827.27	4586.96	2834.63
