# Supplementary material for: Metabolomics and Transcriptomics Provide Insights into Lipid Biosynthesis in the Embryos of Walnut (Juglans regia L.)
Source: Plants (Basel). 2023 Jan 24;12(3):538. doi: 10.3390/plants12030538 (PMC9921657; doi:10.3390/plants12030538)
Supplement: Supplementary file 1 [file plants-12-00538-s001.zip › Table S6.xlsx]

## Sheet: Sheet1
Table S6. Identified related genes and metabolites involved in TCA cycle.
Enzymes	KEGG annotation	Gene ID	FPKM
			60DAP			90DAP			120DAP
			L1_1	L1_2	L1_3	L2_1	L2_2	L2_3	L3_1	L3_2	L3_3
PDH-E1α	pyruvate dehydrogenase E1 component alpha subunit	108989818	59.9834	54.3236	52.9224	11.5097	10.9589	9.91144	15.2664	15.074	15.5762
		108992640	312.87	309.606	308.451	144.142	150.053	147.653	160.105	153.252	187.773
		109008675	10.0353	7.99733	9.562	2.45793	2.84493	2.52295	3.24658	3.83298	3.33234
PDH-E1β	pyruvate dehydrogenase E1 component beta subunit	108983269	25.0831	24.8168	26.4564	7.01391	8.23867	8.77423	5.57447	5.39519	22.6453
		108990189	42.2296	44.282	39.6014	14.5927	14.8613	13.9342	9.55765	9.53024	10.7087
DLAT	pyruvate dehydrogenase E2 component	108986750	73.1777	79.2902	74.9836	19.0451	18.4336	19.2974	17.6464	16.4166	17.3099
		108986754	82.0384	82.3731	76.5351	19.6729	20.3512	18.8619	14.0198	14.6666	12.0541
		109011725	26.5503	25.2514	25.0426	8.07595	7.53734	8.21877	13.6763	15.6923	12.2851
		109015577	7.24252	6.74021	6.82276	1.96996	2.20401	2.21152	2.31595	2.65697	2.16777
DLD	dihydrolipoamide dehydrogenase	108979233	116.269	108.43	112.316	37.3883	40.0962	37.205	26.7635	25.5483	26.3977
		108986181	35.2264	33.7543	32.778	10.5923	9.9587	10.7767	16.9853	18.8371	17.2555
		108994825	17.7504	17.5263	16.9282	4.04661	4.01068	5.02664	6.34836	7.04777	6.49938
PCKA	phosphoenolpyruvate carboxykinase (ATP)	108985360	110.986	104.908	103.903	47.5014	42.4655	48.799	79.1587	86.1616	67.0525
ACLY	ATP-citrate synthase	109021384	44.5592	44.3458	48.4439	9.93261	9.72176	8.39403	7.72605	9.13534	9.23344
		108987913	15.0969	16.705	15.9661	6.72384	7.09462	6.44806	6.20273	4.9635	6.25826
		109020139	93.6346	85.6593	86.6374	35.0935	36.9824	35.9586	35.3808	34.0911	33.3702
ACO	aconitate hydratase	108999475	20.5334	19.0778	18.9082	7.37778	6.57084	7.29117	7.39356	7.37323	5.6348
		109006857	28.3434	27.3454	27.7868	11.0607	10.5726	11.0493	9.72951	10.9795	7.59087
		109011649	27.4306	23.8863	24.3742	9.48295	10.0271	9.70099	10.3313	11.5282	9.00989
IDH1	isocitrate dehydrogenase (NADP)	108982664	10.6334	10.7147	10.9365	4.76487	4.87145	4.89217	3.81266	4.25869	5.10047
		108984074	21.1241	19.4869	20.895	2.94402	3.02087	2.47836	4.26112	4.39081	5.46777
		108988131	41.5035	43.517	45.0104	14.0051	14.2885	16.7965	8.52002	8.89912	10.0415
		109007253	32.5656	31.0405	35.2624	14.662	15.1032	14.983	15.7343	15.9991	16.8353
		109010657	11.3478	11.3495	11.2897	2.46495	2.54571	2.60404	1.81163	1.28432	2.67927
IDH3	isocitrate dehydrogenase (NAD+)	108985178	18.7382	19.0166	16.9919	5.85037	5.30286	6.09476	8.32619	6.05661	7.17865
		109013742	26.1117	25.2823	24.2719	8.88092	8.27751	7.52304	15.719	16.3139	18.9993
OGDH	2-oxoglutarate dehydrogenase	108986378	5.08919	5.45451	5.88312	1.81815	2.03429	1.88995	2.01527	2.68867	1.66653
DLST	dihydrolipoyllysine-residue succinyltransferase	108984324	11.624	12.7082	12.1686	4.68506	4.40233	4.9647	4.33193	4.47277	2.16916
LSC1	succinyl-CoA synthetase alpha subunit	109012218	25.1376	26.0463	26.0631	6.21008	5.46735	5.19882	11.6984	9.95415	13.8828
LSC2	succinyl-CoA synthetase beta subunit	108996030	27.817	27.2678	27.3535	8.39863	6.98052	8.13519	17.5891	20.1248	18.6414
		109010722	22.7293	24.28	24.3001	6.95518	6.54254	5.53634	12.5376	12.0636	11.904
SDHB	succinate dehydrogenase (ubiquinone) iron-sulfur subunit	108986223	97.5569	109.714	95.8207	47.1487	44.6643	42.6299	31.6182	27.2625	29.1407
		109008918	8.98927	8.75239	8.32139	2.75274	2.25028	1.965	6.33223	4.69486	8.16436
SDHA	succinate dehydrogenase (ubiquinone) flavoprotein subunit	108995347	50.608	48.9279	52.291	16.988	17.4736	16.0497	21.6879	23.5967	18.8761
FH	fumarate hydratase	108994152	7.84822	7.47007	7.3343	1.73756	2.00971	1.9904	2.28434	2.66152	2.68106
MDH	malate dehydrogenase	108981044	443.455	453.71	452.249	109.827	104.975	104.427	107.408	95.9865	105.936
		108981475	106.732	110.01	110.343	30.6857	32.6151	31.5337	41.6659	38.4221	43.859
		108992489	86.4323	87.481	85.0195	28.0844	26.8601	24.1142	37.2927	36.3074	42.9033
		109012566	91.1124	97.7266	91.1815	18.078	17.9806	17.5241	30.8614	28.3444	33.3765
MS2Metabolite	MS2kegg	ID	Peak area
			60DAP						90DAP						120DAP
			L1_1	L1_2	L1_3	L1_4	L1_5	L1_6	L2_1	L2_2	L2_3	L2_4	L2_5	L2_6	L3_1	L3_2	L3_3	L3_4	L3_5	L3_6
S-Malate	C00149	pos-M135T59	36638.6	46532.4	41374	36859.9	48608.5	42540.5	18750.3	7262.55	9786.14	12880.6	6716.74	10859.9	8072.47	5336.93	6250.5	3698.58	4258.85	5468.1
Pyruvic acid	C00022	neg-M87T72	55453.5	54641.9	32475	108968	47797.9	32898.7	20938.8	20514.4	20160.5	15835.3	15908.8	26623.1	5868.1	1396.6	5414.01	3827.27	4586.96	2834.63
Oxoglutaric acid	C00026	neg-M145T88	47765	54782.8	35526	56687.7	66585.2	50837.2	72143.1	100955	53495.3	31329	46441.5	71805	2081.97	3734.09	2413.58	4154.02	4109.81	5238.64
Succinic acid	C00042	neg-M117T79	102701	100327	88359.1	82640.5	159782	85664.1	63491.1	37437.9	40901.4	58840.4	59641.6	48222.1	22468.5	23823.6	37584.1	22507.4	24533.7	20512
Citric acid	C00158	neg-M191T72	1.31941e+07	1.45357e+07	1.66883e+07	1.05178e+07	1.36273e+07	1.28947e+07	3.73159e+06	6.41457e+06	7.0005e+06	4.18638e+06	5.26623e+06	7.73042e+06	1.43586e+06	1.30766e+06	1.2327e+06	798694	815348	394288
