# Supplementary material for: Metabolomics and Transcriptomics Provide Insights into Lipid Biosynthesis in the Embryos of Walnut (Juglans regia L.)
Source: Plants (Basel). 2023 Jan 24;12(3):538. doi: 10.3390/plants12030538 (PMC9921657; doi:10.3390/plants12030538)
Supplement: Supplementary file 1 [file plants-12-00538-s001.zip › Table S7.xlsx]

## Sheet: Sheet1
Table S7. Primers used for qPCR analysis
Unigene ID	enzyme	sequence (5′−3′)	annealing temp (°C)
LOC108983551	WRI1	F:GCAGTGGGTTTTCCAGAGGA	60
		R: TCCTGCGTGTTGTAGGTTCC	60
LOC109010453	LACS6	F: AAGTGCCATTGAGGAGGGTG	60
		R: GGATGCGGCTTATCGTCAGA	60
LOC109012153	SAD	F: AAGCTGGAGGATTTGACGGG	60
		R: CCAGCTAAACTTAACGCCGC	60
LOC109001694	FAD2	F: GACTGGCTGAAGGGAGCATT	60
		R: AGAGATGGTGAGCCACATGC	60
LOC109000808	CTα	F: GTTCCGCAAAATCGGTGGTT	60
		R: GGCTCCTTGGCATCCAATCT	60
LOC108998294	FATA	F: CCACAGATGGTTTTGCGACG	60
		R: TTCTTCCATCCCCTTGGCAC	60
LOC109000668	PDAT	F: TGAGGCCAAAGACATCGCAT	60
		R: TCCCAAGTTCGAGAAACCCG	60
LOC109020107	PK	F: TGGGCAAACCTGTTGTCACT	60
		R:ATTTCAGGGTAAGCCCCAGC	60
LOC109018705	LEC1	F: CCTCCAATAGCCCCGTTGTT	60
		R: CCTGTCTTGCTCCCTCACAG	60
LOC108992640	PDH-E1α	F: GTACATGCGCTGAGCAAAGG	60
		R: CACGGGAATCCCTTCACCAA	60
LOC108990189	PDH-E1β	F: AAAGACGCATCGAGTGCTGA	60
		R: TCCTCCAAGGTCCCAGCATA	60
LOC109000715	GAE	F: TTCACGGTGTACGGACCTTG	60
		R: CCCTGTTCTTGCCACGGTAT	60
reference	GAPDH	F: ATGATGTCAAGGTTAAGGACTC	60
gene		R: CACAATGATCTCAGCTCCG	60
